# Supplementary material
Source: Springer Nature journal article supplement (https://www.springermedizin.de/resource/supplementary/12879_2013_3151_MOESM4_ESM.pdf/9446052)
Supplement: MOESM4 [file 9446052]

Clinical sign  
or symptom

SM

Proportion, by infection status

0%

20%

40%

60%

80%

100%

Sorethroat

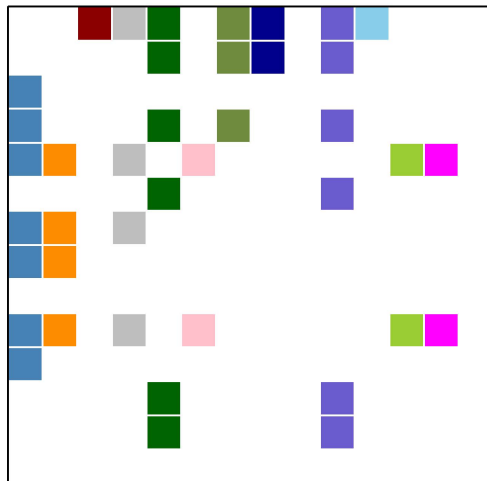

FLU-A(H1N1)pdm09

FLU-A(H3N2)

FLU-A(Unknown)

FLU-B

CV

EV

RV

ADV-E

ADV-B

CoV-OC43

CoV-NL63

CoV-229E

hMPV

hPIV-3

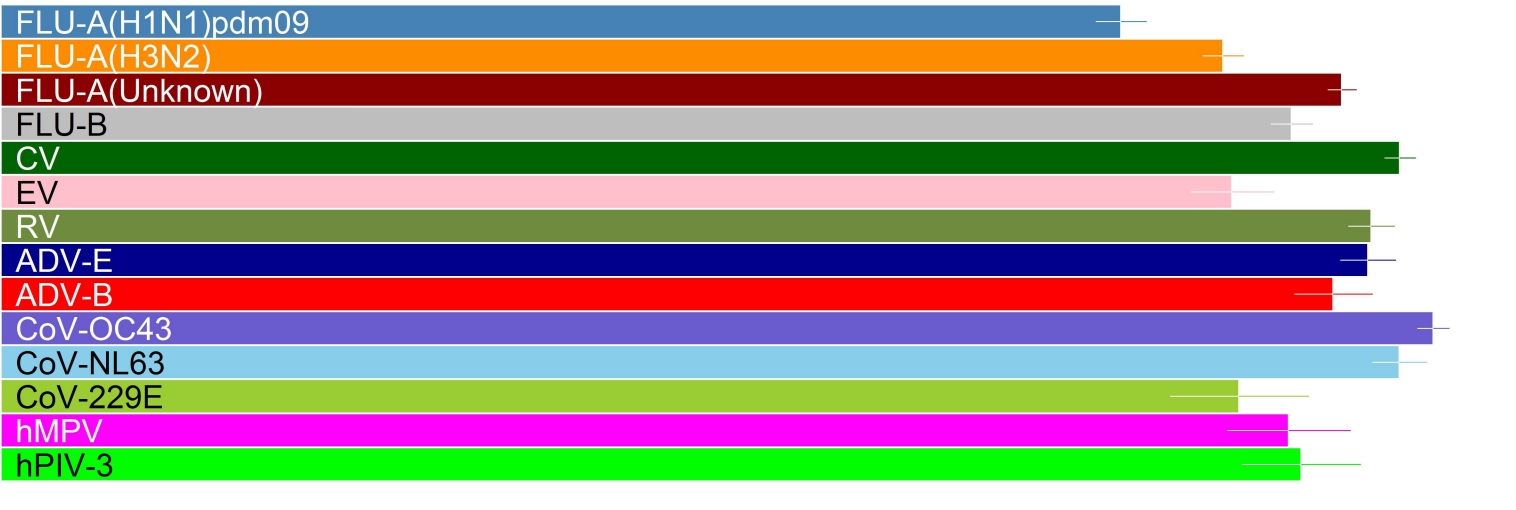

Clinical sign  
or symptom

SM

Proportion, by infection status

0%

20%

40%

60%

80%

100%

Chills Rigors

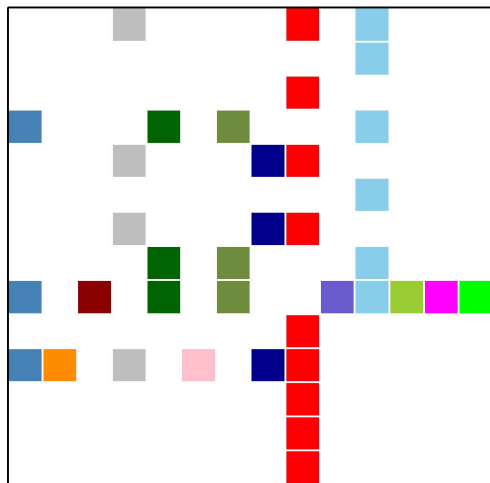

FLU-A(H1N1)pdm09

FLU-A(H3N2)

FLU-A(Unknown)

FLU-B

CV

EV

RV

ADV-E

ADV-B

CoV-OC43

CoV-NL63

CoV-229E

hMPV

hPIV-3

Clinical sign  
or symptom

SM

Proportion, by infection status

0%

20%

40%

60%

80%

100%

Headache

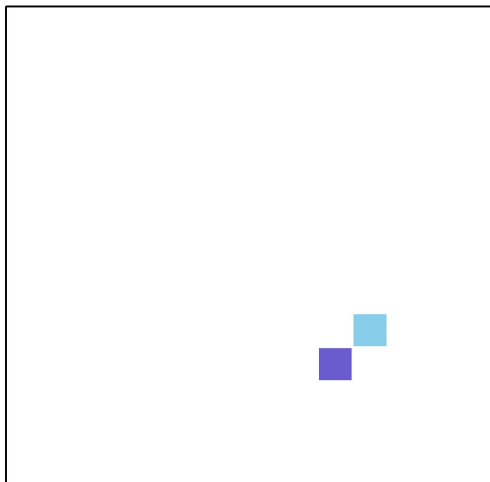

FLU-A(H1N1)pdm09

FLU-A(H3N2)

FLU-A(Unknown)

FLU-B

CV

EV

RV

ADV-E

ADV-B

CoV-OC43

CoV-NL63

CoV-229E

hMPV

hPIV-3

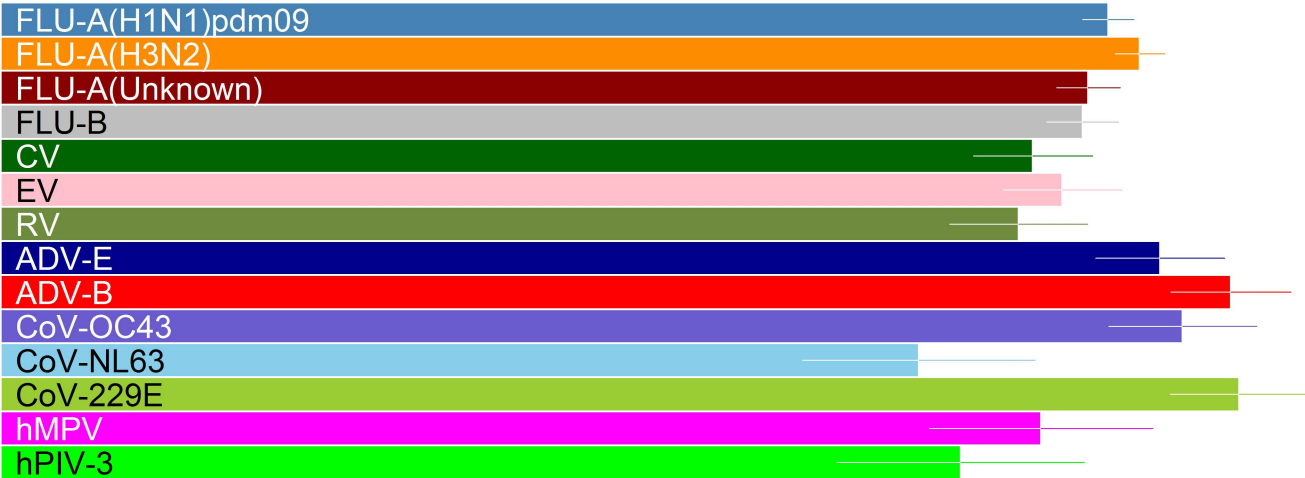

Clinical sign  
or symptom

SM

Proportion, by infection status

0%

20%

40%

60%

80%

100%

Fever  $\geq 37.8^{\circ}\text{C}$

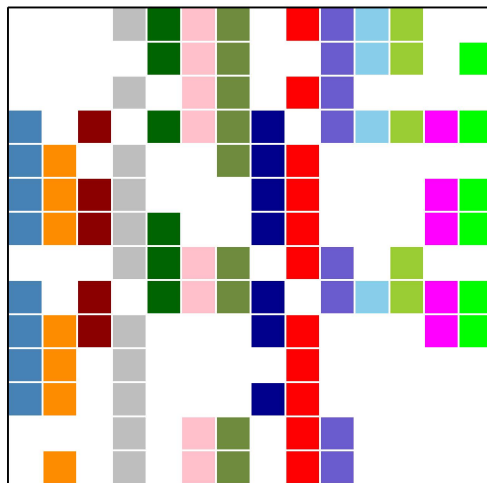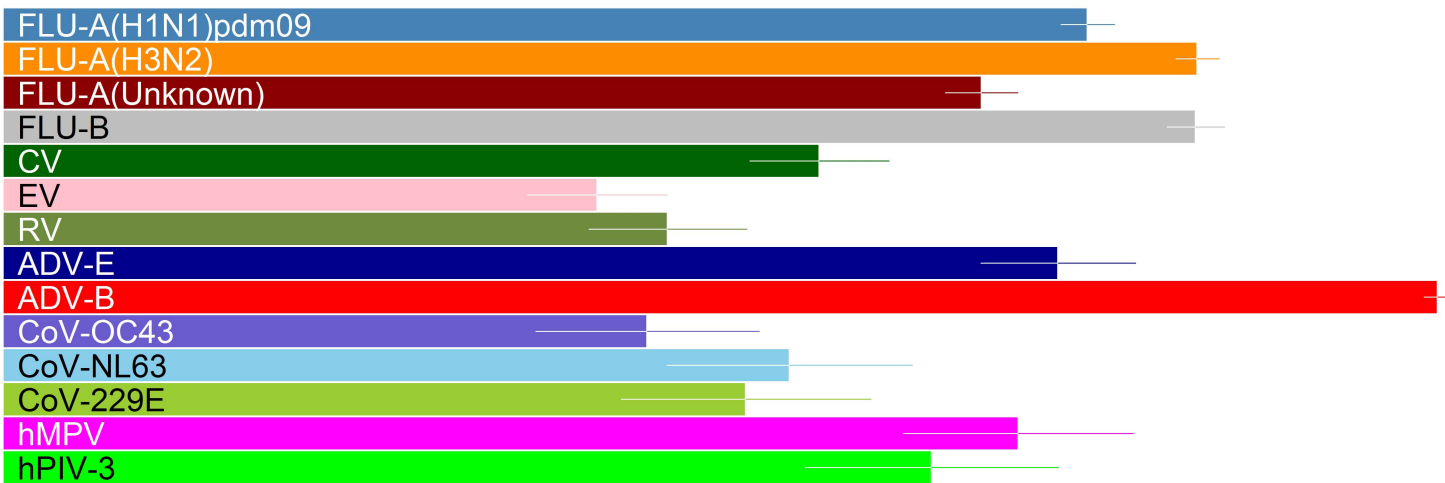

Clinical sign  
or symptom

SM

Proportion, by infection status

0%

20%

40%

60%

80%

100%

Injected pharynx

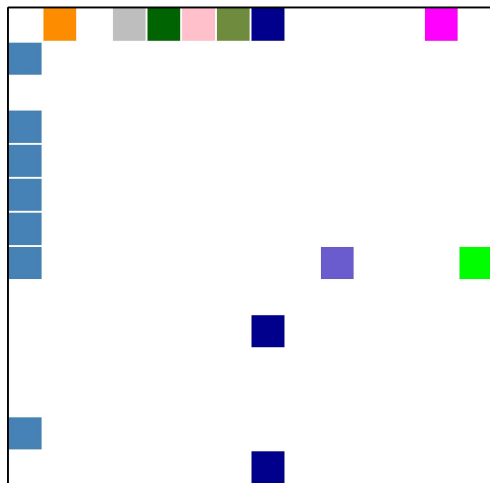

FLU-A(H1N1)pdm09

FLU-A(H3N2)

FLU-A(Unknown)

FLU-B

CV

EV

RV

ADV-E

ADV-B

CoV-OC43

CoV-NL63

CoV-229E

hMPV

hPIV-3

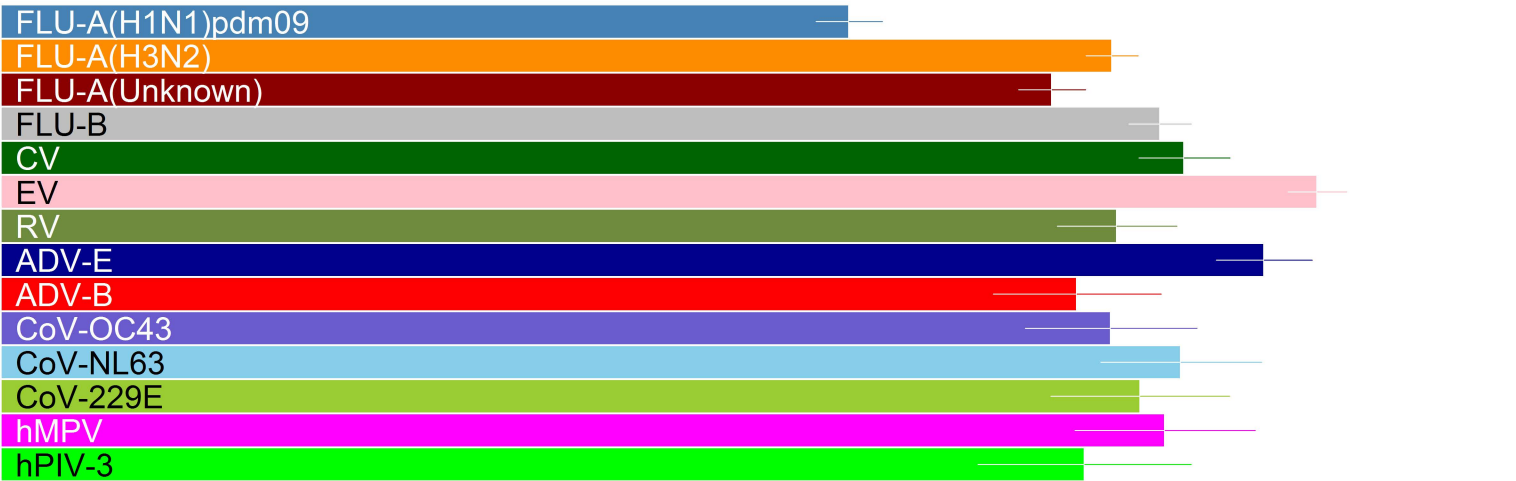

Clinical sign  
or symptom

SM

Proportion, by infection status

0%

20%

40%

60%

80%

100%

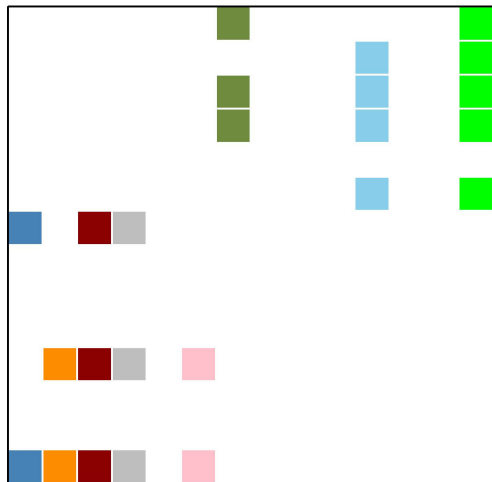

FLU-A(H1N1)pdm09

FLU-A(H3N2)

FLU-A(Unknown)

FLU-B

CV

EV

RV

ADV-E

ADV-B

CoV-OC43

CoV-NL63

CoV-229E

hMPV

hPIV-3

Bodyache

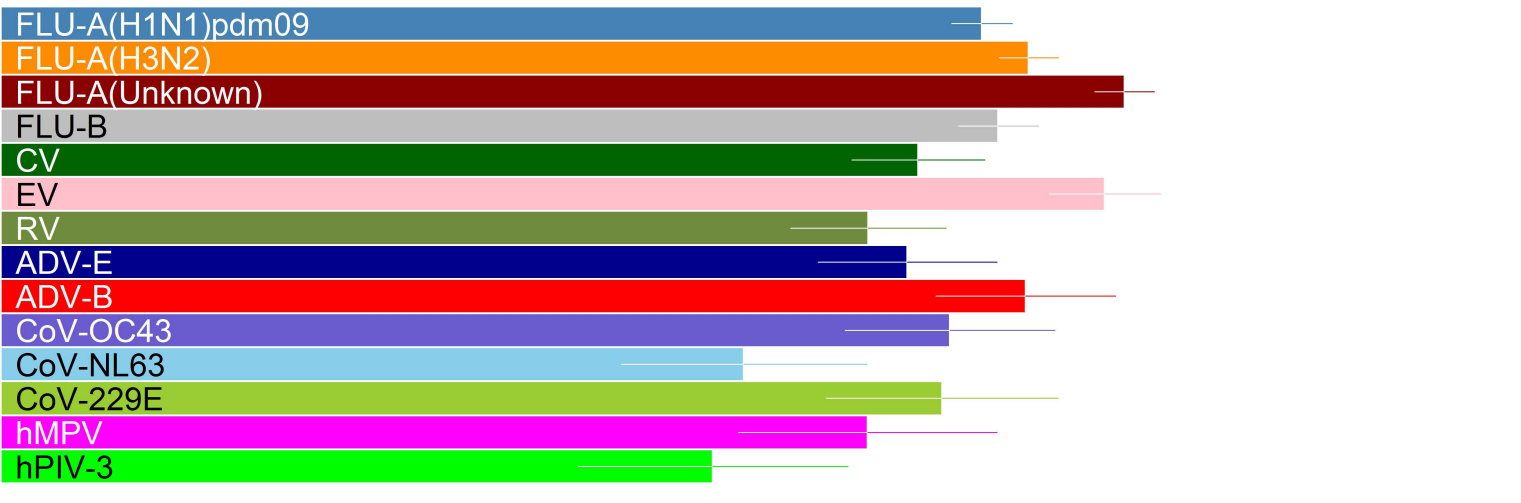

Clinical sign  
or symptom

SM

Proportion, by infection status

0%

20%

40%

60%

80%

100%

Cough with phelgm

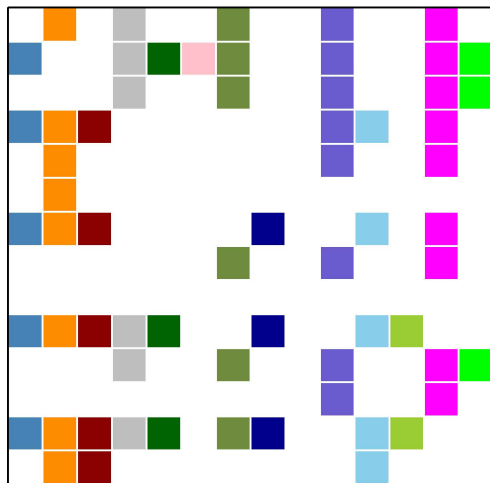

FLU-A(H1N1)pdm09

FLU-A(H3N2)

FLU-A(Unknown)

FLU-B

CV

EV

RV

ADV-E

ADV-B

CoV-OC43

CoV-NL63

CoV-229E

hMPV

hPIV-3

Clinical sign  
or symptom

SM

Proportion, by infection status

0%

20%

40%

60%

80%

100%

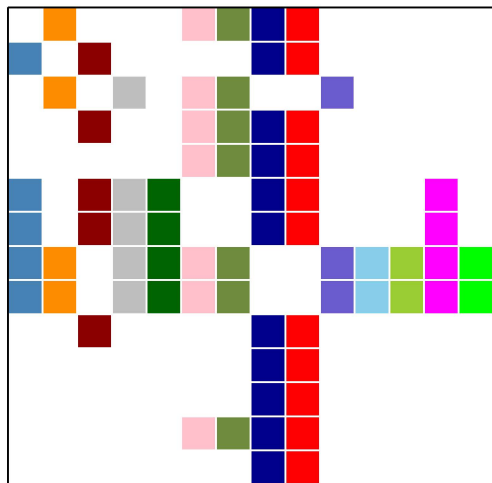

Running nose

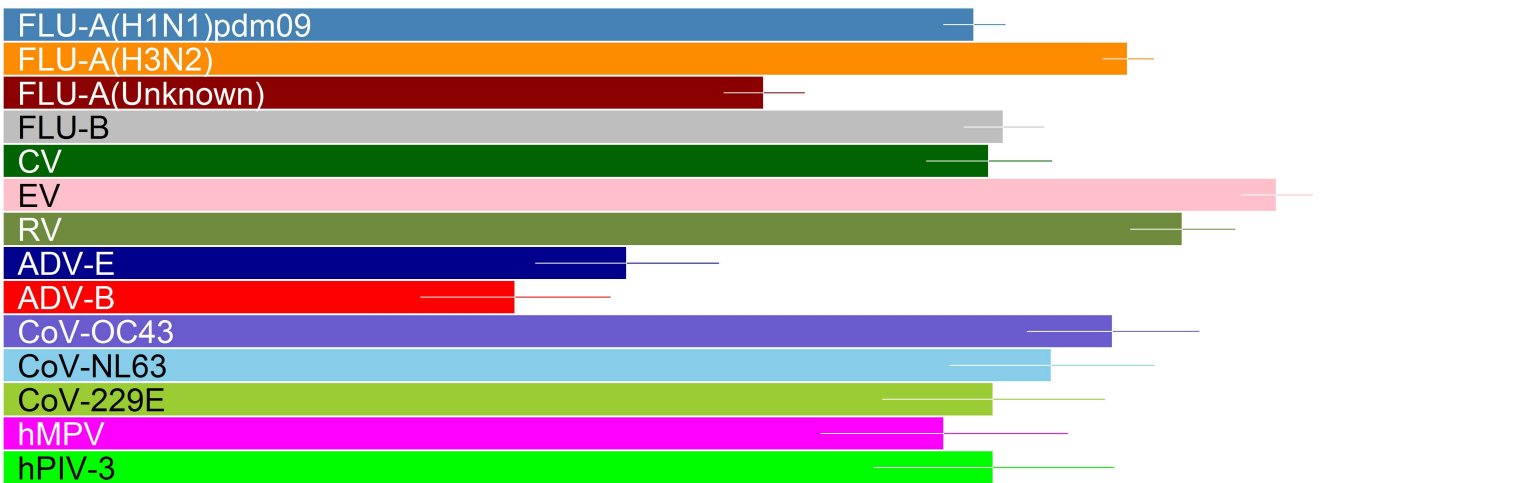



Clinical sign  
or symptom

SM

Proportion, by infection status

0%

20%

40%

60%

80%

100%

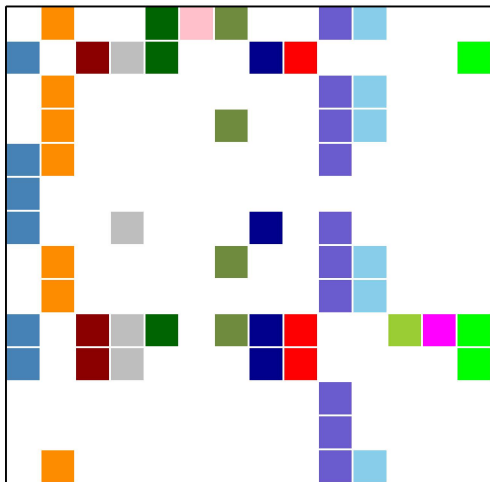

FLU-A(H1N1)pdm09

FLU-A(H3N2)

FLU-A(Unknown)

FLU-B

CV

EV

RV

ADV-E

ADV-B

CoV-OC43

CoV-NL63

CoV-229E

hMPV

hPIV-3

Blocked nose

Clinical sign  
or symptom

SM

Proportion, by infection status

0%

20%

40%

60%

80%

100%

Fever  $\geq 38^{\circ}\text{C}$

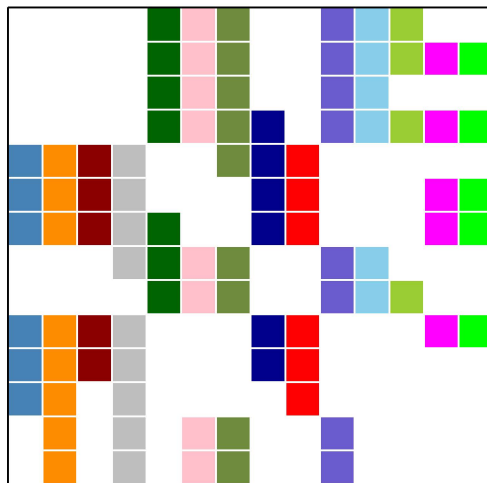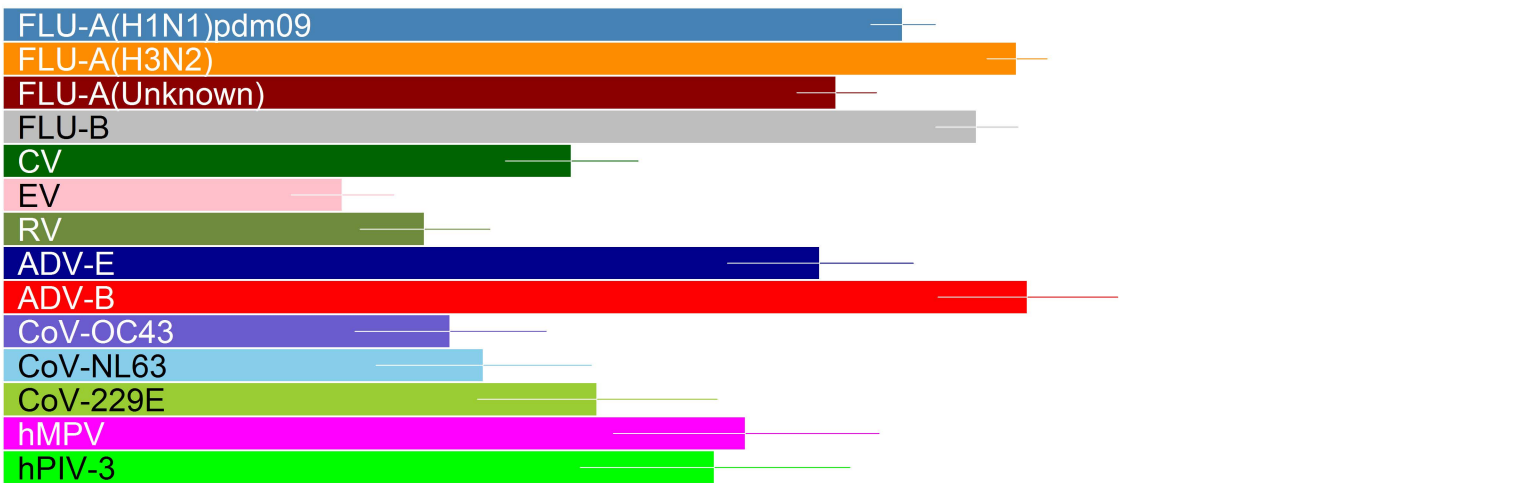

Clinical sign  
or symptom

SM

Proportion, by infection status

0%

20%

40%

60%

80%

100%

Dry cough

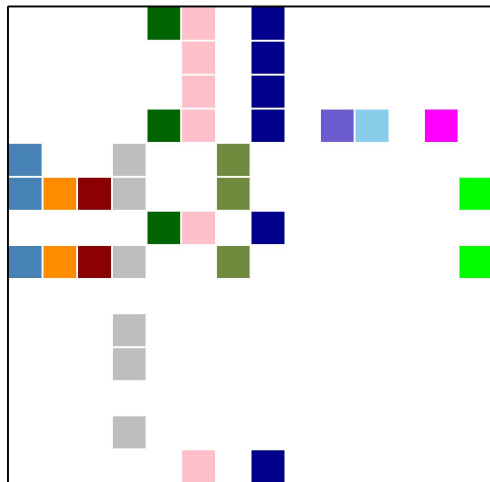

FLU-A(H1N1)pdm09

FLU-A(H3N2)

FLU-A(Unknown)

FLU-B

CV

EV

RV

ADV-E

ADV-B

CoV-OC43

CoV-NL63

CoV-229E

hMPV

hPIV-3

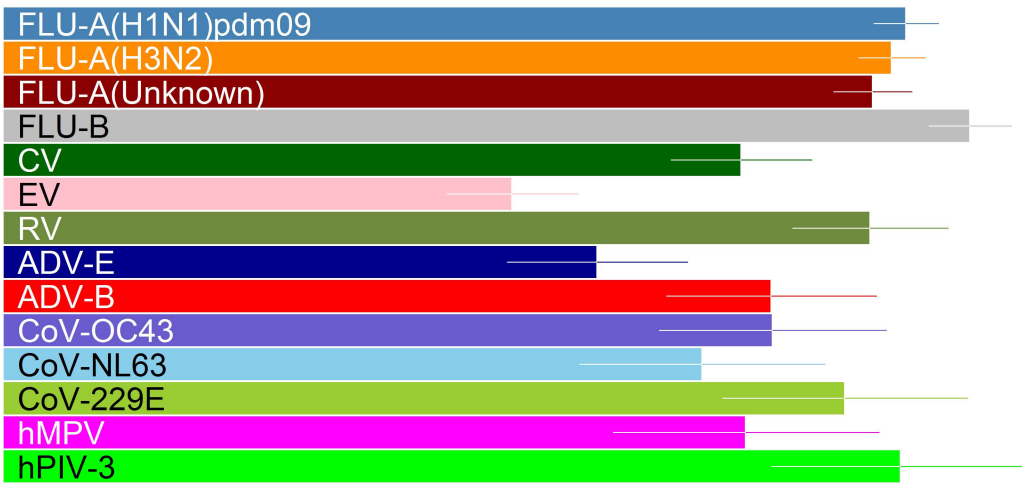

Clinical sign  
or symptom

SM

Proportion, by infection status

0%

20%

40%

60%

80%

100%

Joint pain

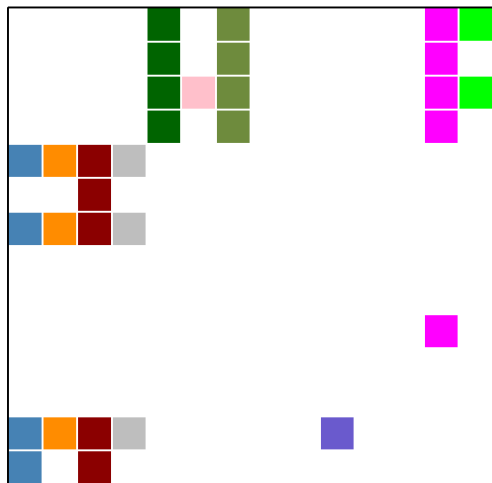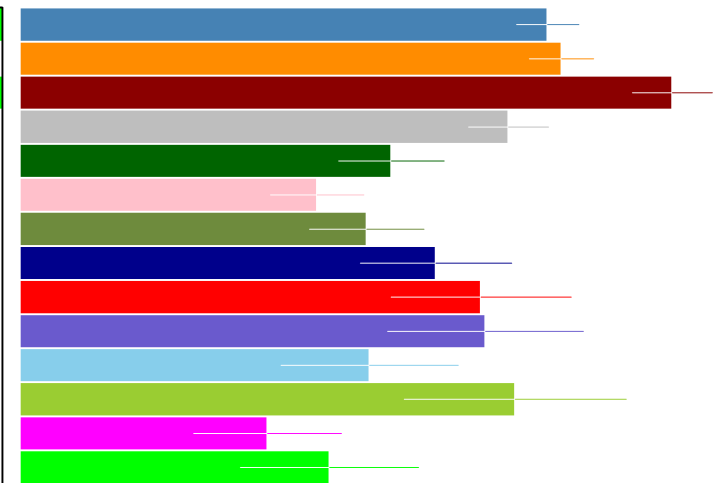

FLU-A(H1N1)pdm09  
FLU-A(H3N2)  
FLU-A(Unknown)  
FLU-B  
CV  
EV  
RV  
ADV-E  
ADV-B  
CoV-OC43  
CoV-NL63  
CoV-229E  
hMPV  
hPIV-3

Clinical sign  
or symptom

SM

Proportion, by infection status

0%

20%

40%

60%

80%

100%

Nausea

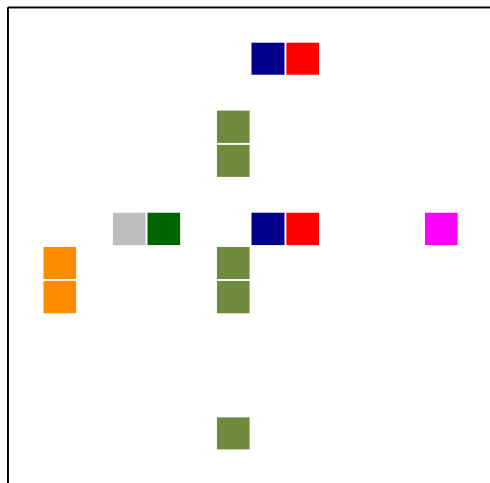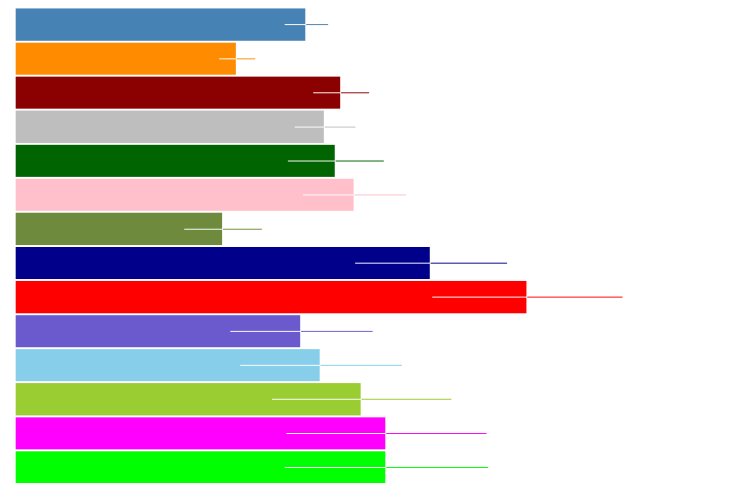

FLU-A(H1N1)pdm09  
FLU-A(H3N2)  
FLU-A(Unknown)  
FLU-B  
CV  
EV  
RV  
ADV-E  
ADV-B  
CoV-OC43  
CoV-NL63  
CoV-229E  
hMPV  
hPIV-3

Clinical sign  
or symptom

SM

Proportion, by infection status

0%

20%

40%

60%

80%

100%

Eye pain

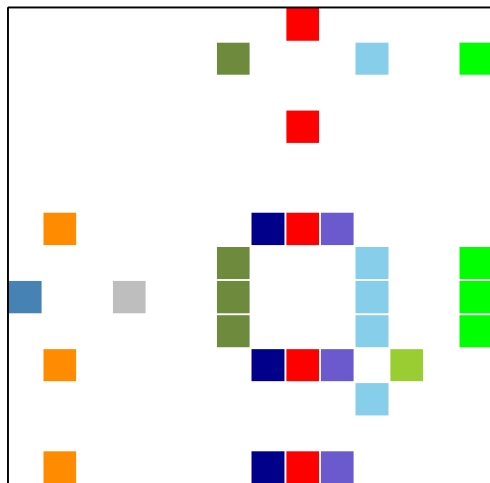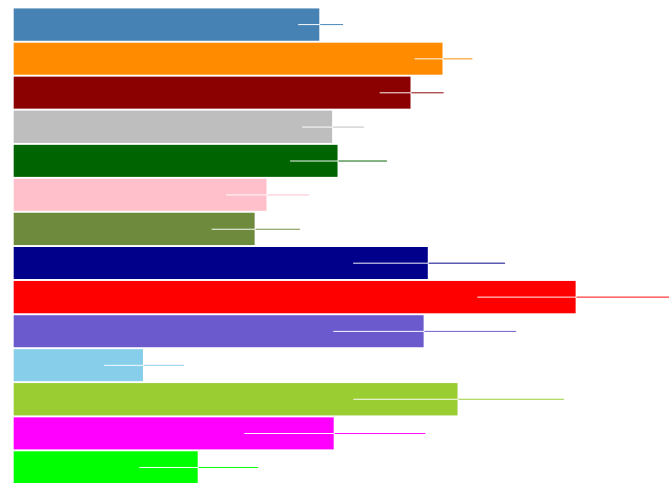

FLU-A(H1N1)pdm09  
FLU-A(H3N2)  
FLU-A(Unknown)  
FLU-B  
CV  
EV  
RV  
ADV-E  
ADV-B  
CoV-OC43  
CoV-NL63  
CoV-229E  
hMPV  
hPIV-3
